# Supplementary material for: Dizincation and dimagnesiation of benzene using alkali-metal-mediated metallation
Source: Royal Society of Chemistry journal article supplement (doi:10.1039/b613655a), 2006-11-09
Supplement: b613655a.pdf [file b613655a.pdf]

## Dizincation and dimagnesium of benzene using alkali-metal-mediated metallation

David R. Armstrong, William Clegg, Sophie H. Dale, David V. Graham, Eva Hevia, Lorna M. Hogg, Gordon W. Honeyman, Alan R. Kennedy and Robert E. Mulvey\*.

### Computational Details

The geometry of the molecules was optimized using Gaussian 03.<sup>1</sup> Exploratory *ab initio* calculations at the Hartree Fock (HF) level were performed, utilising the 6-31g\* basis set.<sup>2</sup> The resultant optimised geometries were subject to a frequency analysis and then refined by further density functional theory (DFT) calculations<sup>3</sup> using the B3LYP functionals<sup>4,5</sup> and the 6-311G\*\* basis set.<sup>6,7</sup> The geometrical structural features from the DFT calculations are reported here while the total energy value from

---

1. Gaussian 03, Revision B.0.5, M. J. Frisch, G. W. Trucks, H. B. Schlegel, G. E. Scuseria, M. A. Robb, J. R. Cheeseman, J. A. Montgomery, Jr., T. Vreven, K. N. Kudin, J. C. Burant, J. M. Millam, S. S. Iyengar, J. Tomasi, V. Barone, B. Mennucci, M. Cossi, G. Scalmani, N. Rega, G. A. Petersson, H. Nakatsuji, M. Hada, M. Ehara, K. Toyota, R. Fukuda, J. Hasegawa, M. Ishida, T. Nakajima, Y. Honda, O. Kitao, H. Nakai, M. Klene, X. Li, J. E. Knox, H. P. Hratchian, J. B. Cross, C. Adamo, J. Jaramillo, R. Gomperts, R. E. Stratmann, O. Yazyev, A. J. Austin, R. Cammi, C. Pomelli, J. W. Ochterski, P. Y. Ayala, K. Morokuma, G. A. Voth, P. Salvador, J. J. Dannenberg, V. G. Zakrzewski, S. Dapprich, A. D. Daniels, M. C. Strain, O. Farkas, D. K. Malick, A. D. Rabuck, K. Raghavachari, J. B. Foresman, J. V. Ortiz, Q. Cui, A. G. Baboul, S. Clifford, J. Cioslowski, B. B. Stefanov, G. Liu, A. Liashenko, P. Piskorz, I. Komaromi, R. L. Martin, D. J. Fox, T. Keith, M. A. Al-Laham, C. Y. Peng, A. Nanayakkara, M. Challacombe, P. M. W. Gill, B. Johnson, W. Chen, M. W. Wong, C. Gonzalez, and J. A. Pople, Gaussian, Inc., Pittsburgh PA, 2003.

2. W. J. Hehre, R. Ditchfield, and J. A. Pople, *J. Chem. Phys.* **1972**, *56*, 2257 P. C. Hariharan and J. A. Pople, *Theo. Chim. Acta* **1973**, *28*, 213.

3. W. Kohn, A. D. Becke and R.G. Parr, *J. Phys. Chem.*, **1996**, *100*, 12974.

4. A.D. Becke, *Phys. Rev. A*, **1988**, *38*, 3098.

5. C.T. Lee, W.T. Yang and R.G.Parr, *Phys.Rev. B*, **1998**, *37*, 785.

6. A. D. McLean and G. S. Chandler, *J. Chem. Phys.*, **1980**, *72*, 5639.

7. R. Krishnan, J. S. Binkley, R. Seeger and J. A. Pople, *J. Chem. Phys.*, **1980**, *72*, 650.

the DFT calculation is adjusted by including the zero-point energy abstracted from the

HF calculation modified by the factor 0.91.

| Molecule                                                                                          | Zero Point EnergyHF/6-31G* /hartrees | Energy / B3LYP/6-311G** /hartrees | Corrected Energy B3LYP/6-311G** /hartrees |
|---------------------------------------------------------------------------------------------------|--------------------------------------|-----------------------------------|-------------------------------------------|
| t-Butane                                                                                          | 0.140762                             | -158.505894                       | -158.377801                               |
| Benzene                                                                                           | 0.107673                             | -232.308550                       | -232.210568                               |
| TMEDA.Na( $\mu$ - <sup>t</sup> Bu)( $\mu$ -TMP)Zn( <sup>t</sup> Bu)                               | 0.778080                             | -3013.937577                      | -3013.229524                              |
| {TMEDA.Na( $\mu$ -TMP)Zn( <sup>t</sup> Bu)} <sub>2</sub> ( $\mu$ -C <sub>6</sub> H <sub>4</sub> ) | 1.383046                             | -5943.243971                      | -5941.985399                              |
| Na( $\mu$ - <sup>t</sup> Bu)( $\mu$ -TMP)Zn( <sup>t</sup> Bu)                                     | 0.535202                             | -2666.066651                      | -2665.579479                              |
| Na( $\mu$ -TMP)Zn( <sup>t</sup> Bu)} <sub>2</sub> ( $\mu$ -C <sub>6</sub> H <sub>4</sub> )        | 0.896888                             | -5247.497542                      | -5246.681374                              |

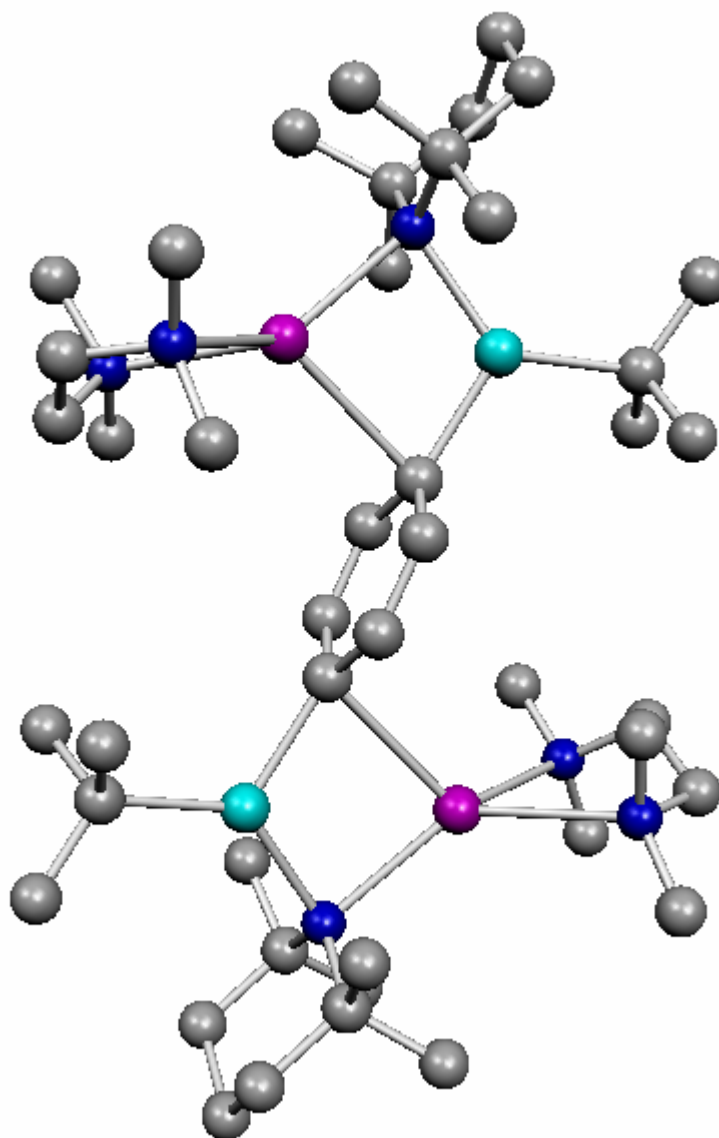

**Principal Bond Lengths/Å and Bond Angles/°**

|                                        |              |
|----------------------------------------|--------------|
| Zn – C                                 | 2.079        |
| Zn – N                                 | 2.069        |
| Na – N                                 | 2.414        |
| Na – C                                 | 2.684        |
| Na...C                                 | 3.234, 3.266 |
| C <sub>ipso</sub> – C <sub>ortho</sub> | 1.411, 1.412 |
| C <sub>ortho</sub> – C <sub>meta</sub> | 1.402, 1.402 |
| Na – N <sub>tmeda</sub>                | 2.632, 2.528 |

|             |       |
|-------------|-------|
| Zn – C – Na | 82.2  |
| C – Na – N  | 87.4  |
| Na – N – Zn | 85.7  |
| N – Zn – C  | 104.8 |

|                            |       |
|----------------------------|-------|
| C – C <sub>ipso</sub> – C  | 113.3 |
| C – C <sub>ortho</sub> – C | 123.3 |
| N – Na – N                 | 74.3  |

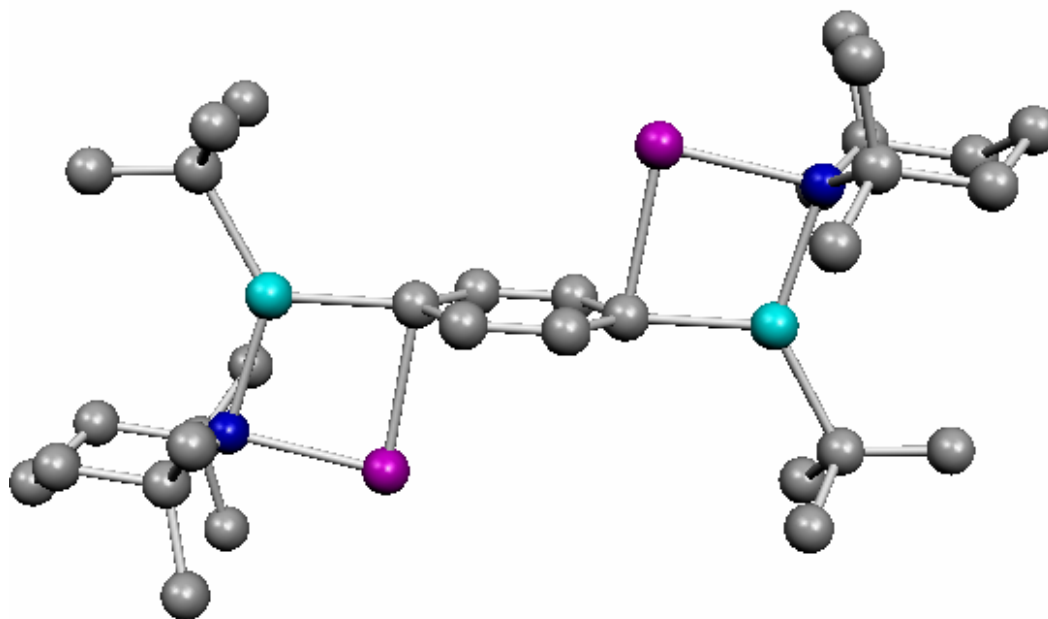

**Principal Bond Lengths/Å and Bond Angles/°**

|                                        |              |
|----------------------------------------|--------------|
| Zn – C                                 | 2.077        |
| Zn – N                                 | 2.088        |
| Na – N                                 | 2.314        |
| Na – C                                 | 2.461        |
| Na...C                                 | 2.926, 2.929 |
| C <sub>ipso</sub> – C <sub>ortho</sub> | 1.413, 1.413 |

$C_{\text{ortho}} - C_{\text{meta}}$  1.403, 1.403

$Zn - C - Na$  82.2

$C - Na - N$  87.4

$Na - N - Zn$  85.7

$N - Zn - C$  104.8

$C - C_{\text{ipso}} - C$  113.7

$C - C_{\text{ortho}} - C$  123.2

### Energetics of the reactions:

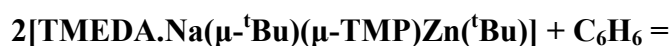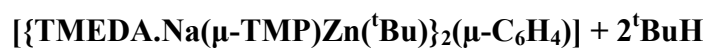

$$\Delta E = -44.8 \text{ kcal mol}^{-1}$$

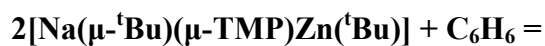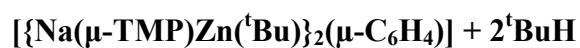

$$\Delta E = -42.3 \text{ kcal mol}^{-1}$$
